# Supplementary material for: The Influence of Microwave-Assisted Extraction on the Phenolic Compound Profile and Biological Activities of Extracts from Selected Scutellaria Species
Source: MDPI journal article supplement (doi:10.3390/molecules28093877), 2023-05-04
Supplement: s1 [file s1]

# The Influence of Microwave-Assisted Extraction on the Phenolic Compound Profile and Biological Activities of Extracts from Selected *Scutellaria* Species

Joanna Oracz <sup>1,\*</sup>, Stanisław Kowalski <sup>2</sup>, Dorota Żyzelewicz <sup>1,\*</sup>, Gabriela Kowalska <sup>1</sup>, Dorota Gumul <sup>2</sup>, Kamila Kulbat-Warycha <sup>1</sup>, Justyna Rosicka-Kaczmarek <sup>1</sup>, Anna Brzozowska <sup>1</sup>, Aleksandra Grzegorzczak <sup>1</sup> and Anna Areczuk <sup>2</sup>

<sup>1</sup> Institute of Food Technology and Analysis, Faculty of Biotechnology and Food Sciences, Lodz University of Technology, 2/22 Stefanowskiego Street, 90-537 Lodz, Poland; kamila.kulbat-warycha@p.lodz.pl (K.K.-W.), gabriela.kowalska@p.lodz.pl (G.K.), justyna.rosicka-kaczmarek@p.lodz.pl (J.R.-K.), 249773@edu.p.lodz.pl (A.B.), 249776@edu.p.lodz.pl (A.G.)

<sup>2</sup> University of Agriculture in Krakow, Faculty of Food Technology, Department of Carbohydrate Technology and Cereal Processing, Poland, 30-149 Krakow, Balicka Str. 122; rrkowsk@cyf-kr.edu.pl (S.K.), rrkowsk@cyf-kr.edu.pl (D.G.), anna.areczuk@urk.edu.pl (A.A.)

\* Correspondence: joanna.oracz@p.lodz.pl (J.O.); dorota.zyzelewicz@p.lodz.pl (D.Ż.), Tel.: +48 42 631 34 62, Fax: +48 42 631 32 43

## Contents

Table S1. The free radical-scavenging activity DPPH assay as IC<sub>50</sub> of optimal extracts from dried roots and leaves of *S. baicalensis* and dried leaves of *S. lateriflora*.

Figure S1. Structures of phenolic compounds found in extracts from dried roots and leaves of *S. baicalensis* and dried leaves of *S. lateriflora*. Chemical structures were drawn using ACD/ChemSketch software.

**Table S1.** The free radical-scavenging activity DPPH assay as IC<sub>50</sub> of optimal extracts from dried roots and leaves of *S. baicalensis* and dried leaves of *S. lateriflora*.

| Plant material                  | Extraction conditions |                    |        | DPPH<br>(IC <sub>50</sub> , µg/mL) |
|---------------------------------|-----------------------|--------------------|--------|------------------------------------|
|                                 | Solvent               | Microwave<br>power | Time   |                                    |
| Root of <i>S. baicalensis</i>   | 70% ethanol           | 63 W               | 10 min | 38.64 ± 0.12                       |
| Leaves of <i>S. baicalensis</i> |                       |                    |        | 43.41 ± 0.17                       |
| Leaves of <i>S. lateriflora</i> |                       |                    |        | 37.46 ± 0.13                       |

Results are presented as the mean ±SD from triplicate determinations; SBR—dried roots of *S. baicalensis*; SBL—dried leaves of *S. baicalensis*; SLL—dried leaves of *S. lateriflora*.

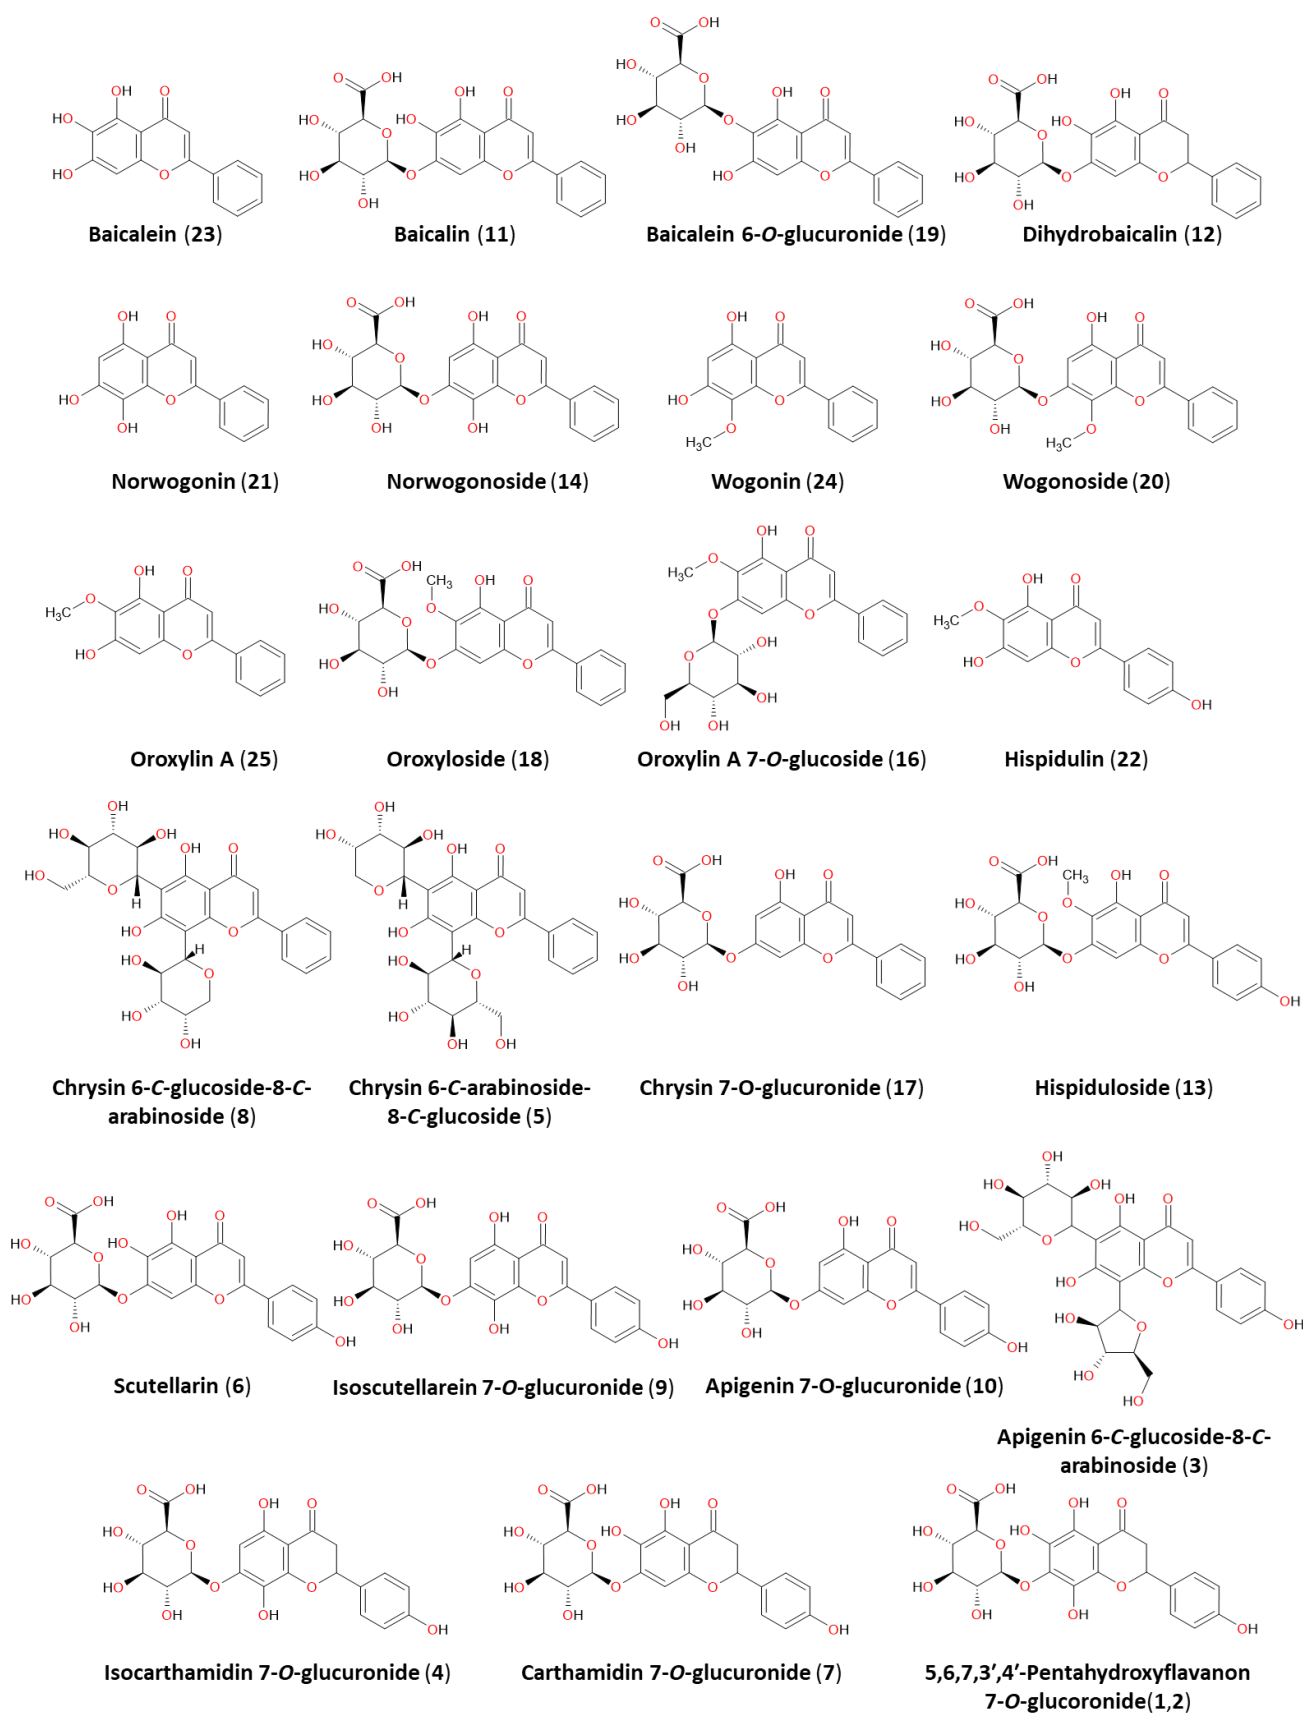

**Figure S1.** Structures of phenolic compounds found in extracts from dried roots and leaves of *S. baicalensis* and dried leaves of *S. lateriflora*. Chemical structures were drawn using ACD/ChemSketch software.
